# Supplementary material
Source: publisher site journal article supplement (https://www.dovepress.com/article/500159)
Supplement: Supplementary file 1 [file get_supplementary_file.php]

**Supplementary Table 1: Comprehensive Terms Associated with Nervous System Regeneration from Functional Enrichment Analysis**. This table encapsulates a curated list of 136 terms derived from functional enrichment analysis related to nervous system regeneration. Terms are ranked by the False Discovery Rate (FDR), utilizing databases such as Gene Ontology (GO) for molecular function (MF) and biological processes (BP), Reactome, KEGG, WikiPathways, and UniProt. Each entry denotes the involvement of specific pathways or molecular functions in the regenerative processes, with an FDR cut-off set below 0.5 to ensure relevance and accuracy.

| **Category** | **Terms related to nervous system regeneration** | **FDR < 0.05** |
| --- | --- | --- |
| GOTERM_MF_DIRECT | GO:0005515~protein binding | 3.02E-40 |
| GOTERM_MF_DIRECT | GO:0045296~cadherin binding | 1.26E-33 |
| REACTOME_PATHWAY | R-HSA-422475~Axon guidance | 1.38E-31 |
| REACTOME_PATHWAY | R-HSA-9675108~Nervous system development | 2.16E-31 |
| REACTOME_PATHWAY | R-HSA-9010553~Regulation of expression of SLITs and ROBOs | 1.62E-29 |
| REACTOME_PATHWAY | R-HSA-376176~Signaling by ROBO receptors | 7.90E-26 |
| REACTOME_PATHWAY | R-HSA-1474244~Extracellular matrix organization | 1.23E-14 |
| GOTERM_BP_DIRECT | GO:0007155~cell adhesion | 7.77E-14 |
| GOTERM_MF_DIRECT | GO:0005178~integrin binding | 1.27E-13 |
| GOTERM_MF_DIRECT | GO:0051015~actin filament binding | 4.29E-13 |
| REACTOME_PATHWAY | R-HSA-9604323~Negative regulation of NOTCH4 signaling | 1.34E-12 |
| GOTERM_BP_DIRECT | GO:0098609~cell-cell adhesion | 3.00E-12 |
| REACTOME_PATHWAY | R-HSA-8948751~Regulation of PTEN stability and activity | 3.44E-12 |
| GOTERM_MF_DIRECT | GO:0003779~actin binding | 5.48E-12 |
| REACTOME_PATHWAY | R-HSA-351202~Metabolism of polyamines | 1.03E-10 |
| KEGG_PATHWAY | hsa04510: Focal adhesion | 1.94E-09 |
| GOTERM_BP_DIRECT | GO:0016477~cell migration | 2.53E-09 |
| GOTERM_MF_DIRECT | GO:0005200~structural constituent of cytoskeleton | 4.68E-09 |
| GOTERM_BP_DIRECT | GO:0045109~intermediate filament organization | 5.18E-09 |
| REACTOME_PATHWAY | R-HSA-1234174~Cellular response to hypoxia | 5.19E-09 |
| GOTERM_MF_DIRECT | GO:0005201~extracellular matrix structural constituent | 5.54E-09 |
| REACTOME_PATHWAY | R-HSA-9012999~RHO GTPase cycle | 5.78E-09 |
| REACTOME_PATHWAY | R-HSA-3000178~ECM proteoglycans | 6.90E-09 |
| GOTERM_MF_DIRECT | GO:0005518~collagen binding | 8.50E-08 |
| REACTOME_PATHWAY | R-HSA-6807070~PTEN Regulation | 2.93E-07 |
| GOTERM_BP_DIRECT | GO:0001525~angiogenesis | 3.42E-07 |
| WIKIPATHWAYS | WP3888: VEGFA VEGFR2 signaling | 3.51E-07 |
| REACTOME_PATHWAY | R-HSA-216083~Integrin cell surface interactions | 3.58E-07 |
| KEGG_PATHWAY | hsa04512: ECM-receptor interaction | 3.95E-07 |
| REACTOME_PATHWAY | R-HSA-3000170~Syndecan interactions | 9.86E-07 |
| REACTOME_PATHWAY | R-HSA-194315~Signaling by Rho GTPases | 1.73E-06 |
| WIKIPATHWAYS | WP306: Focal adhesion | 2.32E-06 |
| REACTOME_PATHWAY | R-HSA-5684996~MAPK1/MAPK3 signaling | 2.41E-06 |
| REACTOME_PATHWAY | R-HSA-9013026~RHOB GTPase cycle | 2.68E-06 |
| REACTOME_PATHWAY | R-HSA-5673001~RAF/MAP kinase cascade | 6.90E-06 |
| REACTOME_PATHWAY | R-HSA-9013106~RHOC GTPase cycle | 7.26E-06 |
| REACTOME_PATHWAY | R-HSA-5683057~MAPK family signaling cascades | 1.13E-05 |
| GOTERM_BP_DIRECT | GO:0031532~actin cytoskeleton reorganization | 1.83E-05 |
| GOTERM_BP_DIRECT | GO:0033627~cell adhesion mediated by integrin | 1.83E-05 |
| GOTERM_MF_DIRECT | GO:0001968~fibronectin binding | 2.24E-05 |
| REACTOME_PATHWAY | R-HSA-3000157~Laminin interactions | 3.04E-05 |
| KEGG_PATHWAY | hsa04810: Regulation of actin cytoskeleton | 3.07E-05 |
| GOTERM_BP_DIRECT | GO:0008360~regulation of cell shape | 3.41E-05 |
| GOTERM_BP_DIRECT | GO:2001046~positive regulation of integrin-mediated signaling pathway | 3.60E-05 |
| WIKIPATHWAYS | WP185: Integrin mediated cell adhesion | 4.08E-05 |
| REACTOME_PATHWAY | R-HSA-1257604~PIP3 activates AKT signaling | 5.28E-05 |
| REACTOME_PATHWAY | R-HSA-3858494~Beta-catenin independent WNT signaling | 6.11E-05 |
| REACTOME_PATHWAY | R-HSA-9006934~Signaling by Receptor Tyrosine Kinases | 8.85E-05 |
| GOTERM_BP_DIRECT | GO:0007015~actin filament organization | 1.43E-04 |
| GOTERM_BP_DIRECT | GO:0007229~integrin-mediated signaling pathway | 1.43E-04 |
| GOTERM_BP_DIRECT | GO:0030335~positive regulation of cell migration | 2.08E-04 |
| REACTOME_PATHWAY | R-HSA-373755~Semaphorin interactions | 2.28E-04 |
| REACTOME_PATHWAY | R-HSA-913531~Interferon Signaling | 2.67E-04 |
| KEGG_PATHWAY | hsa04514: Cell adhesion molecules | 2.88E-04 |
| GOTERM_MF_DIRECT | GO:0050839~cell adhesion molecule binding | 3.03E-04 |
| GOTERM_BP_DIRECT | GO:0032956~regulation of actin cytoskeleton organization | 3.40E-04 |
| REACTOME_PATHWAY | R-HSA-9013409~RHOJ GTPase cycle | 3.77E-04 |
| GOTERM_MF_DIRECT | GO:0043236~laminin binding | 5.56E-04 |
| REACTOME_PATHWAY | R-HSA-1474290~Collagen formation | 5.69E-04 |
| REACTOME_PATHWAY | R-HSA-4420097~VEGFA-VEGFR2 Pathway | 7.74E-04 |
| REACTOME_PATHWAY | R-HSA-9013406~RHOQ GTPase cycle | 8.82E-04 |
| GOTERM_BP_DIRECT | GO:0045216~cell-cell junction organization | 9.97E-04 |
| GOTERM_BP_DIRECT | GO:0043066~negative regulation of apoptotic process | 9.97E-04 |
| GOTERM_BP_DIRECT | GO:0007266~Rho protein signal transduction | 0.00103092 |
| GOTERM_BP_DIRECT | GO:0007160~cell-matrix adhesion | 0.00104466 |
| REACTOME_PATHWAY | R-HSA-449147~Signaling by Interleukins | 0.00112141 |
| REACTOME_PATHWAY | R-HSA-400685~Sema4D in semaphorin signaling | 0.00114032 |
| GOTERM_MF_DIRECT | GO:0008289~lipid binding | 0.00116811 |
| UP_KW_DOMAIN | KW-0440~LIM domain | 0.00119488 |
| GOTERM_BP_DIRECT | GO:0007010~cytoskeleton organization | 0.00222489 |
| REACTOME_PATHWAY | R-HSA-186797~Signaling by PDGF | 0.00243638 |
| REACTOME_PATHWAY | R-HSA-194138~Signaling by VEGF | 0.00251307 |
| GOTERM_MF_DIRECT | GO:0098641~cadherin binding involved in cell-cell adhesion | 0.00257434 |
| REACTOME_PATHWAY | R-HSA-1474228~Degradation of the extracellular matrix | 0.00286952 |
| GOTERM_MF_DIRECT | GO:0031210~phosphatidylcholine binding | 0.00338113 |
| REACTOME_PATHWAY | R-HSA-373760~L1CAM interactions | 0.00374698 |
| GOTERM_BP_DIRECT | GO:0030199~collagen fibril organization | 0.00391207 |
| GOTERM_BP_DIRECT | GO:0051017~actin filament bundle assembly | 0.0039438 |
| GOTERM_BP_DIRECT | GO:0060071~Wnt signaling pathway, planar cell polarity pathway | 0.00403625 |
| GOTERM_MF_DIRECT | GO:0050840~extracellular matrix binding | 0.00413333 |
| UP_KW_DOMAIN | KW-0245~EGF-like domain | 0.00449142 |
| KEGG_PATHWAY | hsa04910: Insulin signaling pathway | 0.00468163 |
| REACTOME_PATHWAY | R-HSA-9035034~RHOF GTPase cycle | 0.00469019 |
| GOTERM_BP_DIRECT | GO:0030866~cortical actin cytoskeleton organization | 0.00472237 |
| GOTERM_BP_DIRECT | GO:1900026~positive regulation of substrate adhesion-dependent cell spreading | 0.00526487 |
| WIKIPATHWAYS | WP3932: Focal adhesion PI3K Akt mTOR signaling pathway | 0.00559953 |
| UP_KW_DOMAIN | KW-0176~Collagen | 0.00575573 |
| KEGG_PATHWAY | hsa00531: Glycosaminoglycan degradation | 0.00601925 |
| GOTERM_MF_DIRECT | GO:0008429~phosphatidylethanolamine binding | 0.00606459 |
| KEGG_PATHWAY | hsa04066:HIF-1 signaling pathway | 0.00666511 |
| GOTERM_BP_DIRECT | GO:0034332~adherens junction organization | 0.00738326 |
| KEGG_PATHWAY | hsa04151:PI3K-Akt signaling pathway | 0.00755402 |
| KEGG_PATHWAY | hsa04071:Sphingolipid signaling pathway | 0.00871929 |
| REACTOME_PATHWAY | R-HSA-1650814~Collagen biosynthesis and modifying enzymes | 0.01021797 |
| GOTERM_BP_DIRECT | GO:0006869~lipid transport | 0.01081281 |
| GOTERM_MF_DIRECT | GO:0005543~phospholipid binding | 0.01185814 |
| REACTOME_PATHWAY | R-HSA-8980692~RHOA GTPase cycle | 0.01219357 |
| GOTERM_BP_DIRECT | GO:2000145~regulation of cell motility | 0.01223723 |
| KEGG_PATHWAY | hsa04520:Adherens junction | 0.01291554 |
| GOTERM_MF_DIRECT | GO:0008092~cytoskeletal protein binding | 0.01321418 |
| GOTERM_BP_DIRECT | GO:0000165~MAPK cascade | 0.01421545 |
| GOTERM_BP_DIRECT | GO:0071363~cellular response to growth factor stimulus | 0.01492936 |
| GOTERM_BP_DIRECT | GO:0030198~extracellular matrix organization | 0.01526812 |
| REACTOME_PATHWAY | R-HSA-375165~NCAM signaling for neurite out-growth | 0.01578972 |
| WIKIPATHWAYS | WP2380:Brain derived neurotrophic factor BDNF signaling pathway | 0.01628487 |
| REACTOME_PATHWAY | R-HSA-9013149~RAC1 GTPase cycle | 0.01674148 |
| REACTOME_PATHWAY | R-HSA-9013423~RAC3 GTPase cycle | 0.01709829 |
| KEGG_PATHWAY | hsa04371:Apelin signaling pathway | 0.01731026 |
| REACTOME_PATHWAY | R-HSA-9696270~RND2 GTPase cycle | 0.01889012 |
| WIKIPATHWAYS | WP4815:Glycosaminoglycan degradation | 0.0207299 |
| UP_KW_DOMAIN | KW-0424~Laminin EGF-like domain | 0.02383139 |
| WIKIPATHWAYS | WP1434:Osteopontin signaling | 0.02403077 |
| GOTERM_BP_DIRECT | GO:0042127~regulation of cell proliferation | 0.02410393 |
| REACTOME_PATHWAY | R-HSA-9013408~RHOG GTPase cycle | 0.02456882 |
| REACTOME_PATHWAY | R-HSA-210991~Basigin interactions | 0.02476026 |
| WIKIPATHWAYS | WP51:Regulation of actin cytoskeleton | 0.02491693 |
| GOTERM_BP_DIRECT | GO:0010976~positive regulation of neuron projection development | 0.0251803 |
| WIKIPATHWAYS | WP437:EGF EGFR signaling pathway | 0.02524571 |
| REACTOME_PATHWAY | R-HSA-69278~Cell Cycle, Mitotic | 0.0271516 |
| REACTOME_PATHWAY | R-HSA-446728~Cell junction organization | 0.0271516 |
| REACTOME_PATHWAY | R-HSA-399955~SEMA3A-Plexin repulsion signaling by inhibiting Integrin adhesion | 0.02780594 |
| GOTERM_BP_DIRECT | GO:0035633~maintenance of permeability of blood-brain barrier | 0.02932356 |
| REACTOME_PATHWAY | R-HSA-437239~Recycling pathway of L1 | 0.03437177 |
| GOTERM_BP_DIRECT | GO:0010595~positive regulation of endothelial cell migration | 0.03493973 |
| REACTOME_PATHWAY | R-HSA-6794362~Protein-protein interactions at synapses | 0.03767704 |
| REACTOME_PATHWAY | R-HSA-416572~Sema4D induced cell migration and growth-cone collapse | 0.03905881 |
| REACTOME_PATHWAY | R-HSA-8875878~MET promotes cell motility | 0.04015997 |
| GOTERM_BP_DIRECT | GO:0060548~negative regulation of cell death | 0.04267741 |
| REACTOME_PATHWAY | R-HSA-877300~Interferon gamma signaling | 0.04449902 |
| REACTOME_PATHWAY | R-HSA-438064~Post NMDA receptor activation events | 0.04529952 |
| GOTERM_MF_DIRECT | GO:0004674~protein serine/threonine kinase activity | 0.04557487 |
| GOTERM_MF_DIRECT | GO:0098639~collagen binding involved in cell-matrix adhesion | 0.04557487 |
| GOTERM_BP_DIRECT | GO:0060333~interferon-gamma-mediated signaling pathway | 0.0456686 |
| REACTOME_PATHWAY | R-HSA-9696273~RND1 GTPase cycle | 0.04609528 |
| GOTERM_BP_DIRECT | GO:0045104~intermediate filament cytoskeleton organization | 0.04721271 |
| GOTERM_BP_DIRECT | GO:0043542~endothelial cell migration | 0.04729442 |

**Supplementary Table 2: Top Expressed miRNAs and Their Mechanisms of Action in Nervous System Regeneration.** This table catalogs the top 30 expressed miRNAs identified as critical in promoting nervous system regeneration through various mechanisms. It presents a compilation of miRNAs alongside their respective references, highlighting the multifaceted rolesthese molecules play in neurodegenerative processes.

| **MicroRNA ID** | **Promote Neurite Outgrowth/ Axon Extension** | **Attenuate Neuroinflammation** | **Promote Neuroprotection/ Inhibit Apoptosis** | **Induce Myelination** | **Induce Angiogenesis** |
| --- | --- | --- | --- | --- | --- |
| hsa-let-7a-5p84,85,123 | ✔ |  |  | ✔ |  |
| hsa-let-7b-5p84 |  | ✔ |  | ✔ |  |
| hsa-let-7c-5p84,87,88 |  | ✔ |  | ✔ |  |
| hsa-let-7d-5p84 |  |  |  | ✔ |  |
| hsa-let-7e-5p84 |  |  |  | ✔ |  |
| hsa-let-7f-5p84,85,89 | ✔ |  |  | ✔ |  |
| hsa-let-7g-5p91 |  |  | ✔ |  |  |
| hsa-let-7i-5p84 |  |  |  | ✔ |  |
| hsa-miR-10a-5p84 |  |  |  | ✔ |  |
| hsa-miR-21-5p56,67,68,70,71,124 | ✔ | ✔ | ✔ |  | ✔ |
| hsa-miR-23a-3p106 |  | ✔ | ✔ |  |  |
| hsa-miR-23b-3p108-110,125 | ✔ | ✔ | ✔ |  |  |
| hsa-miR-26a-5p93,94 | ✔ |  |  |  |  |
| hsa-miR-27a-3p111-113,115-117 |  | ✔ | ✔ |  |  |
| hsa-miR-27b-3p125 |  |  | ✔ |  |  |
| hsa-miR-93-5p118 |  | ✔ | ✔ |  |  |
| hsa-miR-98-5p102 |  | ✔ | ✔ |  |  |
| hsa-miR-143-3p78 | ✔ |  |  |  |  |
| hsa-miR-155-5p120 | ✔ |  |  |  |  |
| hsa-miR-196a-5p98,99 | ✔ |  | ✔ |  |  |
| hsa-miR-191-5p100 |  | ✔ |  |  |  |
| hsa-miR-320a-3p95 | ✔ |  |  |  |  |
| hsa-miR-320b95 | ✔ |  |  |  |  |
| hsa-miR-320c95 | ✔ |  |  |  |  |
| hsa-miR-382-5p83 |  |  |  |  | ✔ |
| hsa-miR-423-5p50,84 |  | ✔ |  |  | ✔ |

**Supplementary Table 3:** Predominantly Expressed miRNAs Associated with Neurological Recovery. This table enumerates the miRNAs among the top 30 expressed that are implicated in promoting regeneration across various neurological injuries and diseases. Each miRNA is listed with corresponding references that have identified its role in enhancing neural repair and recovery.

| **MicroRNA ID** | **Peripheral Nerve Injury** | **Spinal Cord Injury** | **Neurodegenerative Disease** | **Cerebral Ischemia Injury** | **Retina Ganglion Cell Injury** | **Diabetic Neuropathy** | **Traumatic Brain Injury** | **Multiple Sclerosis** | **Glioblastoma** |
| --- | --- | --- | --- | --- | --- | --- | --- | --- | --- |
| hsa-let-7a-5p85,123 | ✔ | ✔ |  |  |  |  |  |  |  |
| hsa-let-7f-5p85,89 | ✔ |  | ✔ |  |  |  |  |  |  |
| hsa-miR-93-5p118,119 | ✔ |  |  |  | ✔ |  |  |  |  |
| hsa-miR-155-5p120 |  | ✔ |  |  |  |  |  |  |  |
| hsa-miR-21-5p68,70,71,124,126 | ✔ | ✔ |  |  |  |  | ✔ |  |  |
| hsa-miR-26a-5p93,94 |  | ✔ |  |  | ✔ |  |  |  |  |
| hsa-miR-423-5p96,97 |  | ✔ |  |  |  | ✔ |  |  |  |
| hsa-miR-27a-3p112,113,115-117 |  | ✔ |  | ✔ |  |  | ✔ | ✔ |  |
| hsa-miR-143-3p83 |  |  | ✔ |  |  |  |  |  |  |
| hsa-let-7g-5p91 |  |  | ✔ |  |  |  |  |  |  |
| hsa-miR-191-5p100 |  |  | ✔ |  |  |  |  |  |  |
| hsa-miR-23b-3p108-110 | ✔ |  | ✔ |  |  |  |  | ✔ |  |
| hsa-miR-196a-5p98,99,127 |  |  | ✔ |  |  |  |  |  |  |
| hsa-miR-151a-5p128 |  |  | ✔ |  |  |  |  |  |  |
| hsa-let-7c-5p87,88 |  |  |  | ✔ |  |  | ✔ |  |  |
| hsa-let-7g-5p92 |  |  |  |  |  |  |  |  | ✔ |
| hsa-miR-100-5p101 |  |  |  |  |  |  |  |  | ✔ |
| hsa-miR-23a-3p106 |  |  |  | ✔ |  |  | ✔ |  |  |
| hsa-miR-382-5p129 |  | ✔ |  |  |  |  |  |  |  |
